# Supplementary material for: Chemical trends in background air quality and the ionic composition of precipitation for the period 1980–2004 from samples collected at Valentia Observatory, Co. Kerry, Ireland
Source: Royal Society of Chemistry journal article supplement (doi:10.1039/b803010c), 2008-01-01
Supplement: b803010c.pdf [file b803010c.pdf]

**ESI Table 1.** The methods used for the analysis of precipitation samples from Valentia Observatory, Co, Kerry, Ireland for 1980 – 2004.

|           | Flame<br>Photometry | Thorin<br>Method | Nessler's<br>Method<br>(After<br>Reduction) | Nessler's<br>Method | AAS    | Ion<br>Chromatography |
|-----------|---------------------|------------------|---------------------------------------------|---------------------|--------|-----------------------|
| Sodium    | 1981 –              | ----             | ----                                        | ----                | 1986 - | 1992 – present        |
| Potassium | 1985                | ----             | ----                                        | ----                | 1992   | 1992 - present        |
| Ammonium  | ----                | ----             | ----                                        | 1986 -              | 1986 - | 1992 - present        |
| Magnesium | ----                | ----             | ----                                        | 1992                | 1992   | 1992 - present        |
| Calcium   | ----                | ----             | ----                                        | ----                | ----   | 1992 - present        |
| Nitrate   | ----                | ----             | 1986 -                                      | ----                | 1987 - | 1992 - present        |
| Sulphate  | ----                | 1980 –           | 1992                                        | ----                | 1992   | 1992 – present        |
|           | ----                | 1991             | ----                                        | ----                | 1986 - |                       |
|           |                     |                  |                                             |                     | 1992   |                       |
|           |                     |                  |                                             |                     | ----   |                       |
|           |                     |                  |                                             |                     | ----   |                       |

**ESI Table 2.** The trend significance (\*\*\*) ( $\alpha = 0.001$ ) and blank cell ( $\alpha > 0.1$ ) and Sen's slope estimate with its 99 % confidence interval (Qmax and Qmin) for sulphur dioxide (SO<sub>2</sub>-S), sulphate (SO<sub>4</sub>-S) and nitrogen dioxide (NO<sub>2</sub>-N) concentrations ( $\mu\text{g m}^{-3}$ ) based on air samples from Valentia Observatory, Co, Kerry, Ireland for 1981 – 2004.

| estimate           | Mann Kendall trend |              |  | Sen's slope |          |        |
|--------------------|--------------------|--------------|--|-------------|----------|--------|
|                    | Test Z             | Significance |  | Q           | Qmin 99% |        |
|                    | Qmax 99%           |              |  |             |          |        |
| SO <sub>2</sub> -S | -4.46              | ***          |  | -0.03       | -0.04    | -0.02  |
| SO <sub>4</sub> -S | -3.44              | ***          |  | -0.01       | -0.02    | -0.003 |
| NO <sub>2</sub> -N | -0.33              |              |  | -0.002      | -0.02    | 0.03   |

**ESI Table 3.** The trend significance (\*\*\*) ( $\alpha = 0.001$ ), \*\* ( $\alpha = 0.01$ ), \* ( $\alpha = 0.05$ ), + ( $\alpha = 0.1$ ) and blank cell ( $\alpha > 0.1$ ) and Sen's slope estimate with its 99% confidence interval (Qmax and Qmin) for seasonal (1) sulphur dioxide (SO<sub>2</sub>-S), (2) sulphate (SO<sub>4</sub>-S) and (3) nitrogen dioxide (NO<sub>2</sub>-N) concentrations ( $\mu\text{g/m}^3$ ) based on air samples from Valentia Observatory, Co, Kerry, Ireland for 1981 – 2004.

| estimate            | Mann Kendall trend |              |  | Sen's slope |          |       |
|---------------------|--------------------|--------------|--|-------------|----------|-------|
|                     | Test Z             | Significance |  | Q           | Qmin 99% |       |
|                     | Qmax 99%           |              |  |             |          |       |
| Spring <sup>1</sup> | -4.23              | ***          |  | -0.04       | -0.07    | -0.02 |
| Summer <sup>1</sup> | -2.88              | **           |  | -0.02       | -0.03    | 0.0   |
| Autumn <sup>1</sup> | -1.80              | +            |  | -0.01       | -0.03    | 0.01  |
| Winter <sup>1</sup> | -3.17              | **           |  | -0.03       | -0.06    | -0.01 |
| Spring <sup>2</sup> | -2.37              | *            |  | -0.02       | -0.04    | 0.0   |
| Summer <sup>2</sup> | -2.71              | **           |  | -0.02       | -0.04    | 0.0   |
| Autumn <sup>2</sup> | -1.13              |              |  | -0.01       | -0.02    | 0.01  |
| Winter <sup>2</sup> | -0.57              |              |  | 0.0         | -0.01    | 0.01  |
| Spring <sup>3</sup> | 0.66               |              |  | 0.01        | -0.05    | 0.04  |
| Summer <sup>3</sup> | -1.42              |              |  | 0.0         | -0.01    | 0.01  |
| Autumn <sup>3</sup> | 0.99               |              |  | 0.02        | -0.02    | 0.06  |
| Winter <sup>3</sup> | -1.16              |              |  | -0.03       | -0.11    | 0.04  |

**ESI Table 4.** The trend significance (\*\*\*, ( $\alpha = 0.001$ ), (+, ( $\alpha = 0.1$ ) and blank cell ( $\alpha > 0.1$ )), Sen's slope estimate with its 99 % confidence interval (Qmax and Qmin) for the composition of precipitation samples from Valentia Observatory, Co, Kerry, Ireland for 1980 – 2004.

| <u>estimate</u> |                       | <u>Mann Kendall trend</u> |              | <u>Sen's slope</u> |        |       |
|-----------------|-----------------------|---------------------------|--------------|--------------------|--------|-------|
|                 |                       | Test Z                    | Significance | Q                  | Qmin   |       |
| 99%             | Qmax 99%              |                           |              |                    |        |       |
|                 | Sodium                | 0.63                      |              | 0.08               | -0.39  | 0.51  |
|                 | Potassium             | 0.32                      |              | 0.01               | -0.03  | 0.03  |
|                 | Ammonium              | 1.03                      |              | 0.00               | -0.01  | 0.01  |
|                 | Magnesium             | -0.86                     |              | -0.01              | -0.09  | 0.06  |
|                 | Calcium               | -1.19                     |              | -0.02              | -0.06  | 0.03  |
|                 | Nitrate               | -0.29                     |              | 0.00               | -0.004 | 0.004 |
|                 | Sulphate              | -0.85                     |              | -0.01              | -0.05  | 0.02  |
|                 | Non-sea salt sulphate | -3.93                     | ***          | -0.01              | -0.01  | 0.0   |
|                 | pH                    | 0.58                      |              | 0.00               | -0.02  | 0.03  |
|                 | Precipitation amount  | 1.80                      | +            | 0.05               | -0.02  | 0.10  |
|                 | Chloride              | -0.54                     |              | -0.26              | -3.37  | 3.50  |

**ESI Table 5.** The ionic correlation between the weighted mean annual ionic concentrations of the precipitation samples from Valentia Observatory, Co, Kerry, Ireland for 1980 – 2004.

|                       | Sodium      | Sulphate    | Non-sea salt sulphate | Calcium     | Nitrate | Ammonium | Magnesium   | Potassium | Chloride |
|-----------------------|-------------|-------------|-----------------------|-------------|---------|----------|-------------|-----------|----------|
| Sodium                | 1.00        |             |                       |             |         |          |             |           |          |
| Sulphate              | 0.82        | 1.00        |                       |             |         |          |             |           |          |
| Non-sea salt sulphate | 0.004       | 0.06        | 1.00                  |             |         |          |             |           |          |
| Calcium               | 0.85        | <b>0.92</b> | 0.23                  | 1.00        |         |          |             |           |          |
| Nitrate               | 0.004       | 0.05        | 0.23                  | 0.02        | 1.00    |          |             |           |          |
| Ammonium              | 0.02        | 0.01        | 0.01                  | 0.003       | 0.01    | 1.00     |             |           |          |
| Magnesium             | 0.76        | <b>0.92</b> | 0.001                 | <b>0.97</b> | 0.06    | 0.002    | 1.00        |           |          |
| Potassium             | 0.49        | 0.63        | 0.02                  | 0.52        | 0.08    | 0.02     | 0.76        | 1.00      |          |
| Chloride              | <b>0.97</b> | 0.98        | 0.002                 | <b>0.98</b> | 0.2     | 0.003    | <b>0.98</b> | 0.79      | 1.00     |

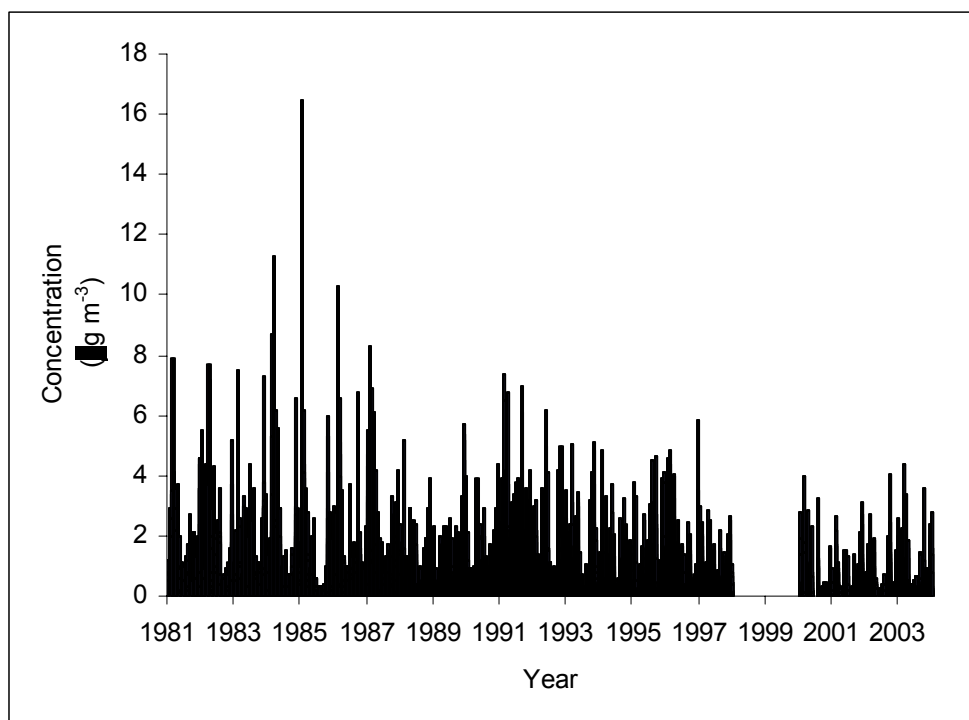

**ESI Fig. S1** The trend for sulphur dioxide concentrations ( $\mu\text{g m}^{-3}$ ) based on air samples from Valentia Observatory, Co. Kerry, Ireland from 1981-2004.

(a)

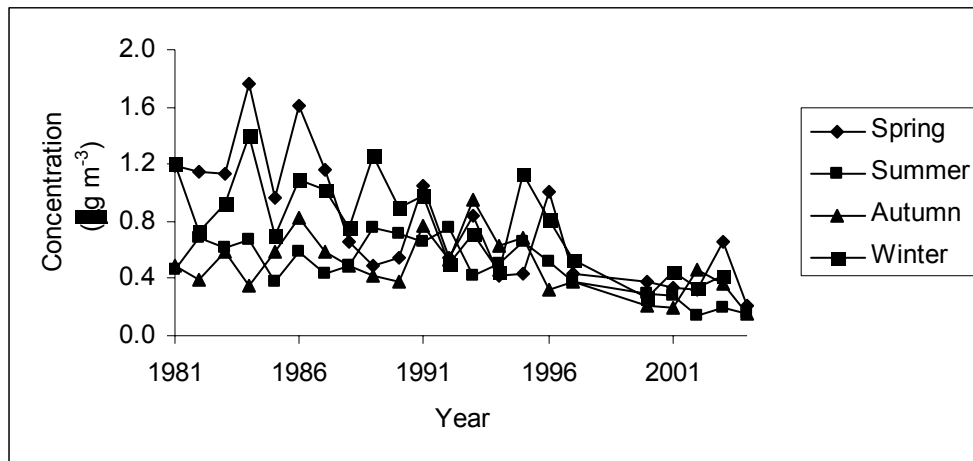

(b)

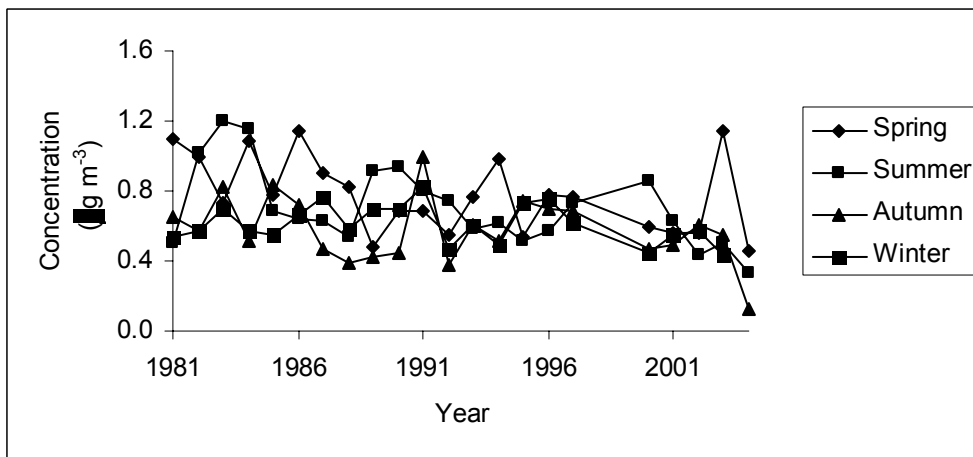

(c)

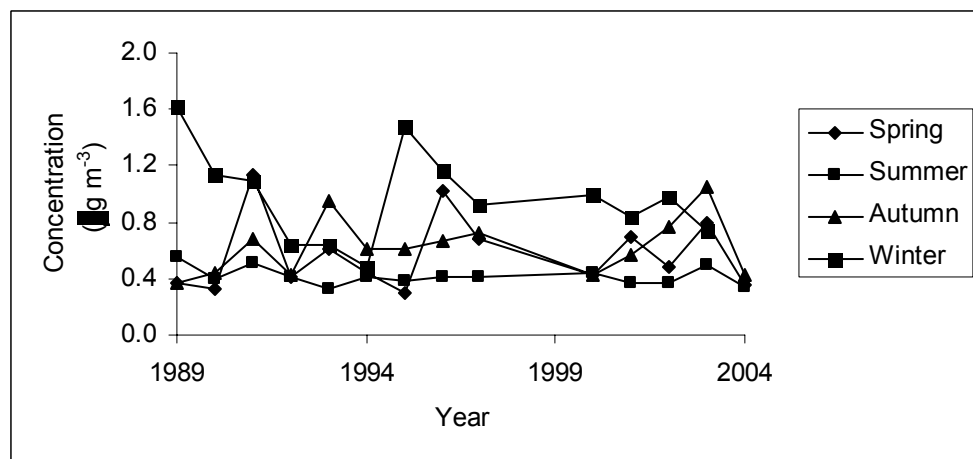

ESI Fig S2. The seasonal average concentrations ( $\mu\text{g m}^{-3}$ ) for (a) sulphur dioxide ( $\text{SO}_2\text{-S}$ ), (b) sulphate ( $\text{SO}_4\text{-S}$ ) and (c) nitrogen dioxide ( $\text{NO}_2\text{-N}$ ) based on air samples from Valentia Observatory, Co. Kerry, Ireland for 1981 – 2004.

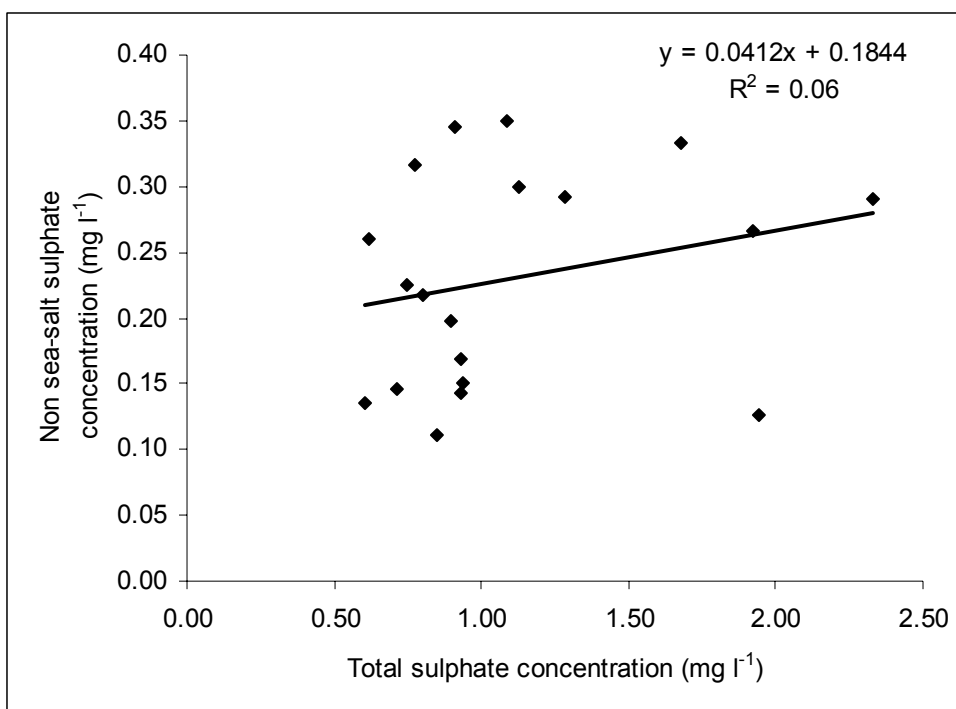

**ESI Fig. S3** The relationship between total sulphate and non-sea salt sulphate concentrations (mg l<sup>-1</sup>) based on precipitation samples from Valentia Observatory, Co, Kerry, Ireland from 1980-2004.

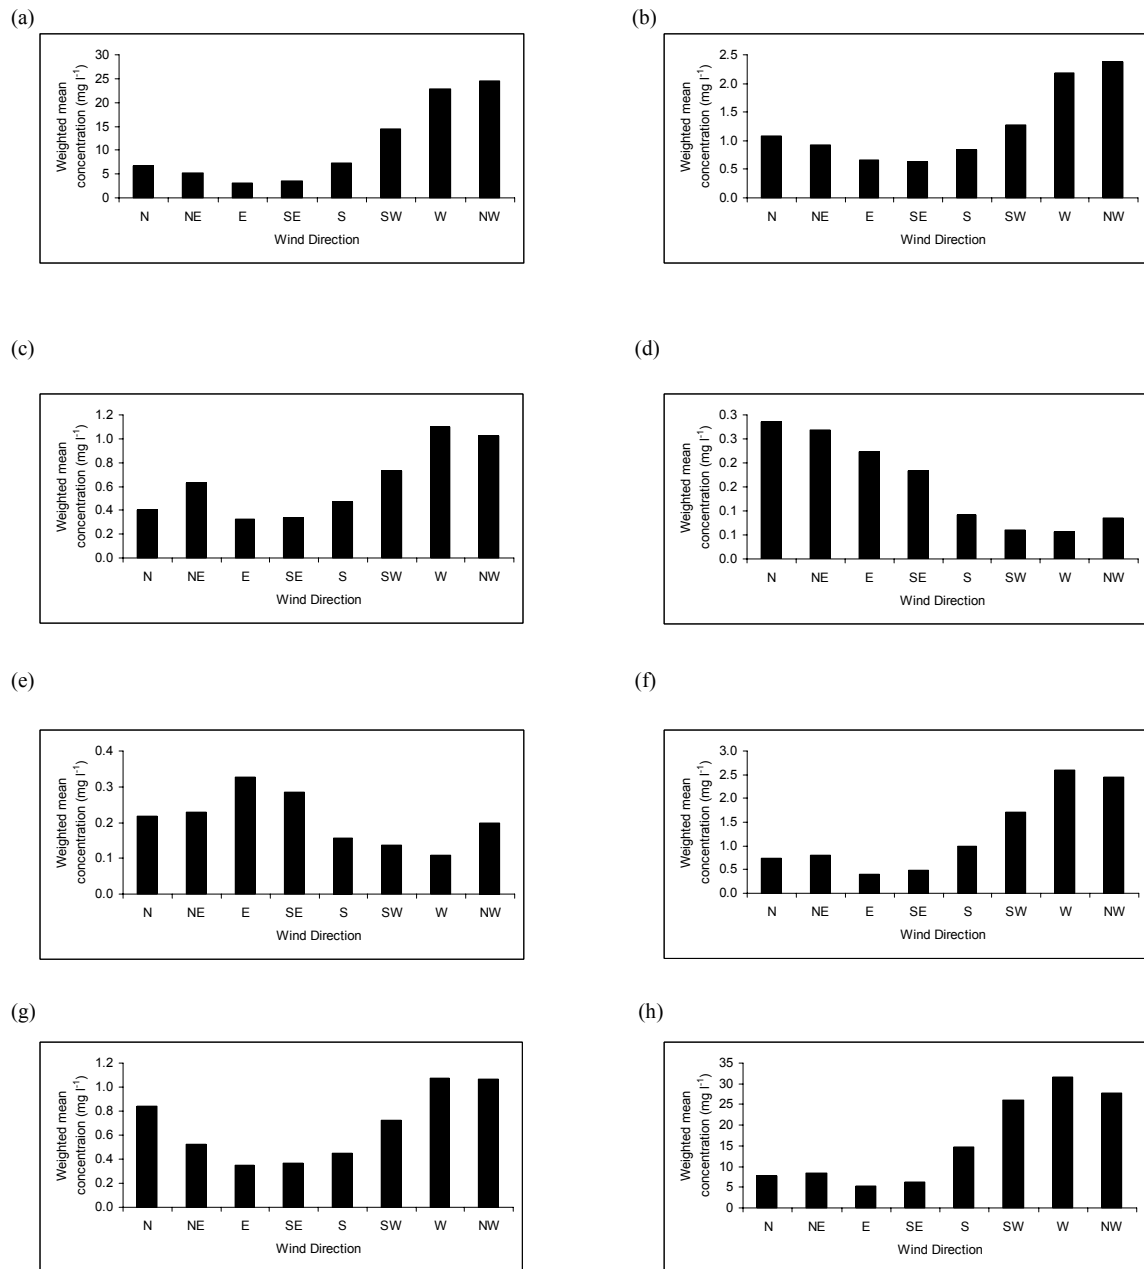

**ESI Fig. S4** The effect of wind direction on weighted mean concentrations (mg l<sup>-1</sup>) of (a) sodium (Na<sup>+</sup>), (b) sulphate (SO<sub>4</sub>-S), (c) calcium (Ca<sup>2+</sup>), (d) nitrate (NO<sub>3</sub>-N), (e) ammonium (NH<sub>4</sub>-N) and (f) magnesium (Mg<sup>2+</sup>), (g) potassium (K<sup>+</sup>) and (h) chloride (Cl<sup>-</sup>) based on precipitation samples from Valentia Observatory, Co, Kerry, Ireland.
